# Supplementary material
Source: MDPI journal article supplement (https://www.mdpi.com/2077-0472/8/12/188)
Supplement: s1 [file s1]

## Supplementary Materials

**Table S1.** The cross tabulation results between farmers' perception of local units' accuracy and buyers' units-related immoral behavior influence extent.

| Research Site |                             |          | The farmer trading partners' Bowl-related immoral behavior influence extent |      |        |     |          | Total |
|---------------|-----------------------------|----------|-----------------------------------------------------------------------------|------|--------|-----|----------|-------|
|               |                             |          | Very High                                                                   | High | Medium | Low | Very Low |       |
| Dendi         | Farmers' perception of      | Agree    | 0                                                                           | 21   | 12     | 13  | 8        | 54    |
|               | Bowl accuracy               | Disagree | 12                                                                          | 21   | 1      | 5   | 0        | 39    |
|               | Total                       |          | 12                                                                          | 42   | 13     | 18  | 8        | 93    |
|               | Farmers' perception of      | Agree    | 1                                                                           | 7    | 4      | 9   | 4        | 25    |
|               | Balance accuracy            | Disagree | 1                                                                           | 3    | 2      | 0   | 0        | 6     |
|               | Total                       |          | 2                                                                           | 10   | 6      | 9   | 4        | 31    |
| Bako-Tibe     | Farmers' perception of      | Agree    | 5                                                                           | 11   | 10     | 13  | 5        | 44    |
|               | Glass accuracy              | Disagree | 13                                                                          | 14   | 5      | 2   | 0        | 34    |
|               | Total                       |          | 18                                                                          | 25   | 15     | 15  | 5        | 78    |
|               | Farmers' perception of      | Agree    | 0                                                                           | 3    | 1      | 0   | 1        | 5     |
|               | Balance accuracy            | Disagree | 4                                                                           | 2    | 2      | 0   | 0        | 8     |
|               | Total                       |          | 4                                                                           | 5    | 3      | 0   | 1        | 13    |
| Adea          | Farmers' perception of Sack | Agree    | 1                                                                           | 14   | 14     | 19  | 4        | 52    |
|               | accuracy                    | Disagree | 8                                                                           | 12   | 0      | 0   | 0        | 20    |
|               | Total                       |          | 9                                                                           | 26   | 14     | 19  | 4        | 72    |
|               | Farmers' perception of Can  | Agree    | 0                                                                           | 0    | 0      | 4   | 0        | 4     |
|               | accuracy                    | Disagree | 1                                                                           | 8    | 3      | 2   | 0        | 14    |
|               | Total                       |          | 1                                                                           | 8    | 3      | 6   | 0        | 18    |
| Gimbichu      | Farmers' perception of sack | Agree    | 0                                                                           | 14   | 7      | 8   | 19       | 48    |
|               | accuracy                    | Disagree | 3                                                                           | 5    | 4      | 6   | 0        | 18    |
|               | Total                       |          | 3                                                                           | 19   | 11     | 14  | 19       | 66    |
|               | Farmers' perception of Can  | Agree    | 0                                                                           | 0    | 1      | 4   | 2        | 7     |
|               | accuracy                    | Disagree | 0                                                                           | 1    | 2      | 1   | 0        | 4     |
|               | Total                       |          | 0                                                                           | 1    | 3      | 5   | 2        | 11    |
